# Supplementary material for: Electron superhalogens as positronium superhalogens
Source: Royal Society of Chemistry journal article supplement (doi:10.1039/d4cp01221f), 2024-01-01
Supplement: d4cp01221f1.pdf [file d4cp01221f1.pdf]

Electronic Supporting Information for:  
Electron superhalogens as positronium superhalogens

Rafael Porras-Roldan<sup>a</sup>, Felix Moncada<sup>b</sup>, Jorge Charry<sup>c</sup>, Marcio Varela<sup>d</sup>, Roberto Flores-Moreno<sup>e</sup> and Andrés Reyes<sup>a‡</sup>

<sup>a</sup> Department of Chemistry, Universidad Nacional de Colombia, Av. Cra 30 45-03, Bogotá, Colombia

<sup>b</sup> Department of Physics, AlbaNova University Center, Stockholm University, 106 91, Stockholm, Sweden.

<sup>c</sup> Department of Physics and Materials Science, University of Luxembourg, L-1511 Luxembourg City, Luxembourg

<sup>d</sup> Instituto de Física, Universidade de São Paulo, Rua do Matão 1731, 05508-090 São Paulo, Brazil

<sup>e</sup> Departamento de Química, Universidad de Guadalajara, Blvd. Marcelino García Barragán 1421, Col Olímpica, Guadalajara Jal., C.P. 44430, Mexico.

‡ Corresponding author

email: areyesv@unal.edu.co

## Contents

|                                                        |          |
|--------------------------------------------------------|----------|
| <b>S1 Basis set preliminary studies</b>                | <b>2</b> |
| <b>S2 VDE and Vertical PA</b>                          | <b>3</b> |
| <b>S3 Partial charge analysis</b>                      | <b>4</b> |
| <b>S4 Optimized geometries</b>                         | <b>5</b> |
| <b>S5 Energy decomposition analysis</b>                | <b>6</b> |
| <b>S6 Electrostatic potential and positron density</b> | <b>7</b> |

## S1 Basis set preliminary studies

First, the impact of the electronic basis set (BS) selection was evaluated. The aug-cc-pVXZ (X=D,T,Q) electronic BS series was combined with the PSX-TZ BS for the positron. Results for  $\text{LiF}_2$  and  $\text{MgCl}_3$  are summarized in Table S1. The PAs and EAs calculated with the smaller DZ BS are within 0.1 eV of the results obtained with the larger TZ and QZ BS.

**Table S1** Convergence test with respect to electronic basis set. All values in eV.

| $\text{LiF}_2$ | EA   | PA   | P <sub>s</sub> BE | $\text{MgCl}_3$ | EA   | PA   | P <sub>s</sub> BE |
|----------------|------|------|-------------------|-----------------|------|------|-------------------|
| DZ             | 5.75 | 3.71 | 2.66              | DZ              | 5.70 | 2.91 | 1.81              |
| TZ             | 5.77 | 3.78 | 2.75              | TZ              | 5.71 | 2.97 | 1.88              |
| QZ             | 5.82 | 3.80 | 2.82              | QZ              | -    | 2.99 | -                 |

Next, the impact of an additional positron BS centered on the metal atom was evaluated for four systems. This test was performed with the chosen aug-cc-pVDZ and PSX-TZ BS for electrons and positron respectively. The results are presented in Table S2). The impact of the additional positron BS on the PAs is almost negligible, as it increases the predictions only by 0.01-0.02 eV.

**Table S2** Additional positron basis set test. All values in eV.

| System            | PA   | P <sub>s</sub> BE | PA <sup>†</sup> | P <sub>s</sub> BE <sup>†</sup> |
|-------------------|------|-------------------|-----------------|--------------------------------|
| LiBr <sub>2</sub> | 3.05 | 1.08              | 3.07            | 1.09                           |
| AlCl <sub>4</sub> | 2.93 | 2.25              | 2.93            | 2.25                           |
| MgBr <sub>3</sub> | 2.81 | 1.28              | 2.82            | 1.28                           |
| BBr <sub>4</sub>  | 3.03 | 1.32              | 3.04            | 1.32                           |

<sup>†</sup> With additional positron BS centered on the metal atom.

Additionally, the impact of the electronic BS choice, from the aug-cc-pVXZ (X=D,T,Q) series, was evaluated for the  $\text{LiF}_2$  EDA results. These calculations were performed with and without positron BS centered on the Li atom. The results are summarized on Table S3. These results reveal that the increase in the PA observed with the larger basis sets arises from the higher relative contribution of the correlation term.

**Table S3** EDA contributions (in %) on PA[ $\text{LiF}_2^-$ ] with respect to to electronic basis set and center of the positron BS.

|    | E <sub>Elec</sub>      | E <sub>Cor</sub>       | E <sub>Rlx</sub>     |
|----|------------------------|------------------------|----------------------|
| DZ | 90.7/90.8 <sup>†</sup> | 9.1/9.2 <sup>†</sup>   | 0.2/0.2 <sup>†</sup> |
| TZ | 89.1/89.2 <sup>†</sup> | 10.6/10.7 <sup>†</sup> | 0.2/0.2 <sup>†</sup> |
| QZ | 88.6/88.7 <sup>†</sup> | 11.1/11.2 <sup>†</sup> | 0.2/0.2 <sup>†</sup> |

<sup>†</sup> With additional positron BS centered on the metal atom.

## S2 VDE and Vertical PA

The vertical electron detachment energy of  $Y^-$  ( $VDE[Y^-]$ ) corresponds to the process:

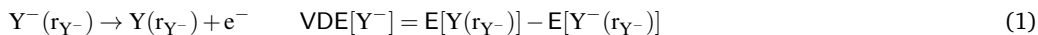

where  $r_{Y^-}$  denotes the optimized geometry of the anion.

Differences in the EA and vertical electron detachment values range from 0.54 to 3.05 eV and can be attributed to a significant geometric relaxation upon the release of an electron by the anion. A comparison between the optimized geometry of SH anions, summarized in Table 4 of the main document, and the neutral SH molecules, presented in Table S7 of the SI, reveals considerable changes in the M–X bond lengths and a reduction in symmetry in the neutral complex. Existing studies offer detailed information on the significant geometric relaxation after electron detachment in SH anions<sup>1</sup>.

Vertical positron  $PA^V$  affinities follow:

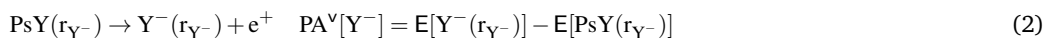

Vertical PsBE will be calculated as:

$$PsBE^V[Y] = VDE[Y^-] + PA^V[Y^-] - 6.8 \quad (3)$$

Results for VDE and  $PA^V$  are presented in Table S4.

**Table S4** VDE/ $PA^V$  energies (in eV) of the  $MX_{k+1}^-$  systems.

| X  | $LiX_2^-$ | $BeX_3^-$ | $BX_4^-$  |           |           |
|----|-----------|-----------|-----------|-----------|-----------|
| F  | 6.72/3.71 | 8.29/3.59 | 9.10/3.54 |           |           |
| Cl | 6.05/3.20 | 6.83/3.17 | 6.59/3.15 |           |           |
| Br | 5.56/3.07 | 6.26/3.05 | 5.94/3.03 |           |           |
| X  | $NaX_2^-$ | $MgX_3^-$ | $AlX_4^-$ | $SiX_5^-$ | $PX_6^-$  |
| F  | 6.35/3.56 | 8.17/3.28 | 9.55/3.21 | 9.31/3.21 | 9.94/3.19 |
| Cl | 5.80/3.05 | 6.97/2.91 | 7.30/2.93 | 7.76/2.93 | 6.80/2.93 |
| Br | 5.46/2.89 | 6.46/2.81 | 6.60/2.84 | 5.85/2.84 | 6.08/2.85 |

**Table S5** Vertical positronium binding energies of the  $MX_{k+1}$  SH systems estimated from Eq. (3), at the MC-MP2/aug-cc-pVDZ/PSX-TZ level of theory. All values in eV.

| X  | $LiX_2$ | $BeX_3$ | $BX_4$  |         |        |
|----|---------|---------|---------|---------|--------|
| F  | 3.63    | 5.08    | 5.84    |         |        |
| Cl | 2.45    | 3.20    | 2.94    |         |        |
| Br | 1.81    | 2.51    | 2.17    |         |        |
| X  | $NaX_2$ | $MgX_3$ | $AlX_4$ | $SiX_5$ | $PX_6$ |
| F  | 3.12    | 4.68    | 5.96    | 5.72    | 6.34   |
| Cl | 2.04    | 3.08    | 3.43    | 3.89    | 2.93   |
| Br | 1.56    | 2.47    | 2.64    | 1.89    | 2.13   |

### S3 Partial charge analysis

**Table S6** Total electrostatic charges (CHELPG ESP)

| System | A     | B                     | C     | D                     |
|--------|-------|-----------------------|-------|-----------------------|
| LiF2   | 0.822 | -0.911                | 0.811 | -0.906                |
| NaF2   | 0.891 | -0.949                | 0.898 | -0.945                |
| BeF3   | 1.219 | -0.739                | 1.188 | -0.729                |
| MgF3   | 1.518 | -0.840                | 1.503 | -0.834                |
| BF4    | 1.203 | -0.551                | 1.144 | -0.536                |
| AlF4   | 1.511 | -0.628                | 1.471 | -0.618                |
| SiF5   | 1.728 | -0.521(ax)/-0.583(eq) | 1.687 | -0.578(eq)/-0.510(ax) |
| PF6    | 1.715 | -0.453                | 1.660 | -0.443                |
| LiCl2  | 0.702 | -0.851                | 0.672 | -0.836                |
| NaCl2  | 0.774 | -0.887                | 0.770 | -0.885                |
| BeCl3  | 0.940 | -0.647                | 0.882 | -0.629                |
| MgCl3  | 1.186 | -0.730                | 1.144 | -0.714                |
| BCl4   | 0.850 | -0.462                | 0.758 | -0.440                |
| AlCl4  | 0.958 | -0.490                | 0.882 | -0.470                |
| SiCl5  | 1.052 | -0.356(ax)/-0.493(eq) | 0.981 | -0.335(ax)/-0.487(eq) |
| PCl6   | 0.984 | -0.331                | 0.905 | -0.317                |
| LiBr2  | 0.677 | -0.839                | 0.637 | -0.819                |
| NaBr2  | 0.746 | -0.872                | 0.736 | -0.867                |
| BeBr3  | 0.888 | -0.629                | 0.823 | -0.608                |
| MgBr3  | 1.121 | -0.707                | 1.071 | -0.690                |
| BBr4   | 0.834 | -0.458                | 0.734 | -0.433                |
| AlBr4  | 0.894 | -0.473                | 0.804 | -0.451                |
| SiBr5  | 0.989 | -0.333(ax)/-0.495(eq) | 0.913 | -0.310(ax)/-0.491(eq) |
| PBr6   | 1.000 | -0.333                | 0.916 | -0.320                |

<sup>A</sup> Metal charge in  $\text{MX}_{k+1}^-$

<sup>B</sup> Halogen charge in  $\text{MX}_{k+1}^-$

<sup>C</sup> Metal charge in  $\text{PsMX}_{k+1}$

<sup>D</sup> Halogen charge in  $\text{PsMX}_{k+1}$

## S4 Optimized geometries

**Table S7** MP2/aug-cc-pVDZ optimized metal halogen distances in neutral  $\text{MX}_{k+1}$  systems

| System | M-X1      | M-X2      | M-X3      | M-X4      | M-X5      | M-X6  |
|--------|-----------|-----------|-----------|-----------|-----------|-------|
| LiF2*  | 1.711     | 1.710     | -         | -         | -         | -     |
| NaF2*  | 2.061     | 2.061     | -         | -         | -         | -     |
| BeF3   | 1.423     | 1.423     | 2.098     | -         | -         | -     |
| MgF3   | 1.775     | 1.775     | 2.264     | -         | -         | -     |
| BF4    | 1.336     | 1.336     | 1.336     | 2.691     | -         | -     |
| AlF4   | 1.667     | 1.667     | 1.667     | 1.667     | 2.189     | -     |
| SiF5   | 1.607     | 1.607     | 1.607     | 1.607     | 3.209     | -     |
| PF6    | 1.586(eq) | 1.586(eq) | 1.586(eq) | 1.620(ax) | 1.620(ax) | 3.374 |
| LiCl2* | 2.203     | 2.202     | -         | -         | -         | -     |
| NaCl2* | 2.573     | 2.573     | -         | -         | -         | -     |
| BeCl3  | 1.975     | 1.975     | 1.835     | -         | -         | -     |
| MgCl3  | 2.367     | 2.367     | 2.211     | -         | -         | -     |
| BCl4   | 1.786     | 1.786     | 1.943     | 1.943     | -         | -     |
| AlCl4  | 2.113     | 2.113     | 2.270     | 2.270     | -         | -     |
| SiCl5  | 2.064     | 2.054     | 2.051     | 2.051     | 3.837     | -     |
| PCl6   | 2.056(eq) | 2.056(eq) | 2.072(eq) | 2.162(ax) | 2.162(ax) | 3.981 |
| LiBr2* | 2.370     | 2.370     | -         | -         | -         | -     |
| NaBr2* | 2.737     | 2.737     | -         | -         | -         | -     |
| BeBr3  | 2.123     | 2.123     | 1.986     | -         | -         | -     |
| MgBr3  | 2.517     | 2.517     | 2.358     | -         | -         | -     |
| BBr4   | 2.002     | 2.002     | 2.002     | 2.002     | -         | -     |
| AlBr4  | 2.268     | 2.268     | 2.428     | 2.428     | -         | -     |
| SiBr5  | 2.234     | 2.213     | 2.213     | 2.218     | 3.944     | -     |
| PBr6   | 2.260(eq) | 2.232(eq) | 2.227(eq) | 2.360(ax) | 2.630(ax) | 4.022 |

All values in Å

\* Li/NaMX<sub>2</sub> systems lose the linear geometry forming an XMX angle different from 180

## S5 Energy decomposition analysis

**Table S8** EDA results for  $e^+$ SH anions complexes. Energy values in atomic units.

| System | $E_{\text{elec}}$ | $E_{\text{rlx}}$ | $E_{\text{corr}}$ | $e^+$ BE |
|--------|-------------------|------------------|-------------------|----------|
| LiF2   | 0.123828          | 0.000274         | 0.012393          | 0.136495 |
| NaF2   | 0.118896          | 0.000255         | 0.011613          | 0.130763 |
| BeF3   | 0.117452          | 0.000180         | 0.014182          | 0.131814 |
| MgF3   | 0.108691          | 0.000113         | 0.011808          | 0.120612 |
| BF4    | 0.114242          | 0.000162         | 0.015585          | 0.129989 |
| AlF4   | 0.105155          | 0.000108         | 0.012786          | 0.118050 |
| SiF5   | 0.103533          | 0.000094         | 0.014324          | 0.117951 |
| PF6    | 0.101811          | 0.000078         | 0.015418          | 0.117307 |
| LiCl2  | 0.098663          | 0.000265         | 0.018697          | 0.117625 |
| NaCl2  | 0.093922          | 0.000161         | 0.017912          | 0.111995 |
| BeCl3  | 0.094543          | 0.000324         | 0.021724          | 0.116590 |
| MgCl3  | 0.088028          | 0.000223         | 0.018824          | 0.107075 |
| BCl4   | 0.091725          | 0.000236         | 0.023885          | 0.115846 |
| AlCl4  | 0.086219          | 0.000231         | 0.021160          | 0.107609 |
| SiCl5  | 0.084001          | 0.000166         | 0.023419          | 0.107586 |
| PCl6   | 0.081761          | 0.000120         | 0.025834          | 0.107715 |
| LiBr2  | 0.092535          | 0.000324         | 0.019412          | 0.112272 |
| NaBr2  | 0.087764          | 0.000157         | 0.018382          | 0.106303 |
| BeBr3  | 0.088723          | 0.000380         | 0.022934          | 0.112037 |
| MgBr3  | 0.082900          | 0.000286         | 0.020075          | 0.103261 |
| BBr4   | 0.085919          | 0.000265         | 0.025317          | 0.111501 |
| AlBr4  | 0.081266          | 0.000277         | 0.022838          | 0.104382 |
| SiBr5  | 0.078888          | 0.000572         | 0.023434          | 0.102894 |
| PBr6   | 0.076375          | 0.000143         | 0.028164          | 0.104681 |

Additionally, we present in Fig S1 the relation between the  $E_{\text{Elec}}$  and the charge on the halogen atoms for the  $\text{MX}_{k+1}^-$  systems

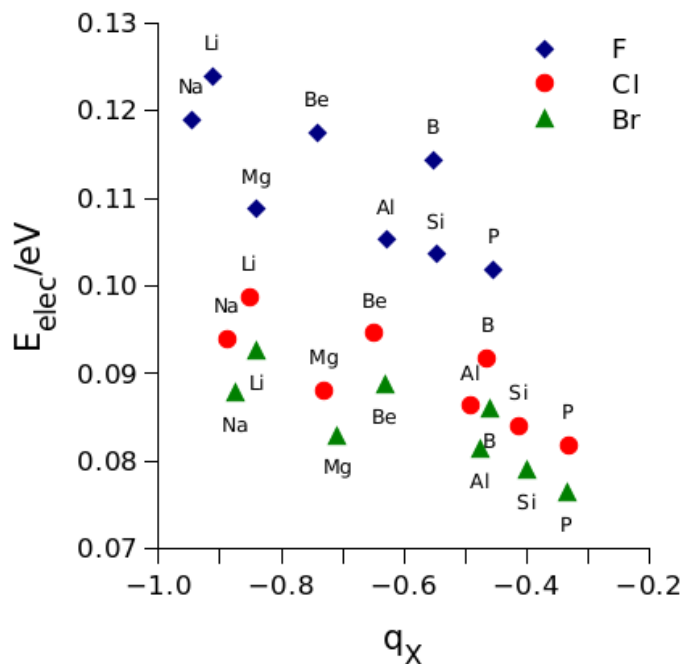

**Figure S1** Total electrostatic charge (CHELPG ESP) on a halogen atom in  $\text{MX}_k^-$  compared to the electrostatic term of the PA energy decomposition.

## S6 Electrostatic potential and positron density

We present plots (Figs. S2-S9) for total electrostatic potential (ESP) and positron density of  $\text{MX}_{k+1}^-$  and  $\text{PsMX}_k$  respectively. Potential and density values in a.u., X and Y axis in Å.

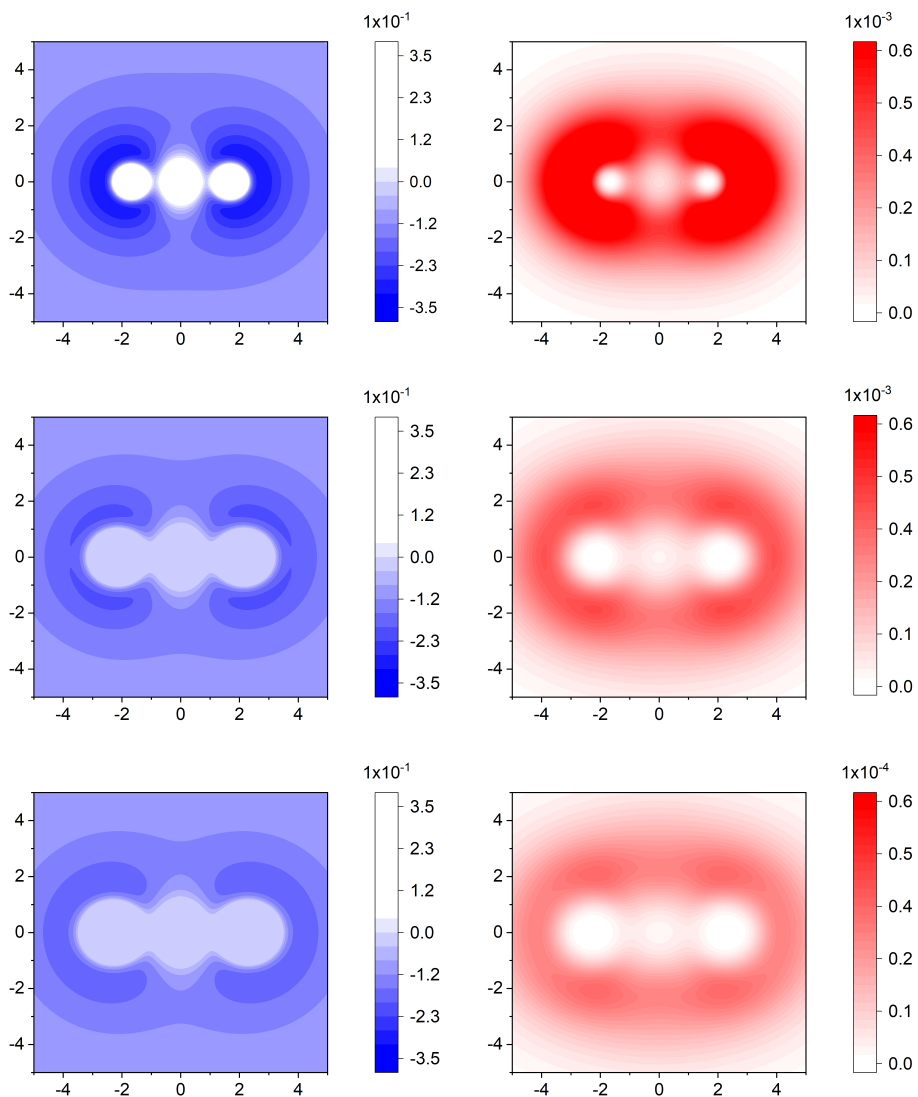

**Figure S2** Top left : ESP of  $\text{LiF}_2^-$ , Middle left: ESP of  $\text{LiCl}_2^-$ , Bottom left: ESP of  $\text{LiBr}_2^-$ . Top right: positron density of  $\text{PsLiF}_2$ , Middle right: positron density of  $\text{PsLiCl}_2$ , Bottom right: positron density of  $\text{PsLiBr}_2$ .

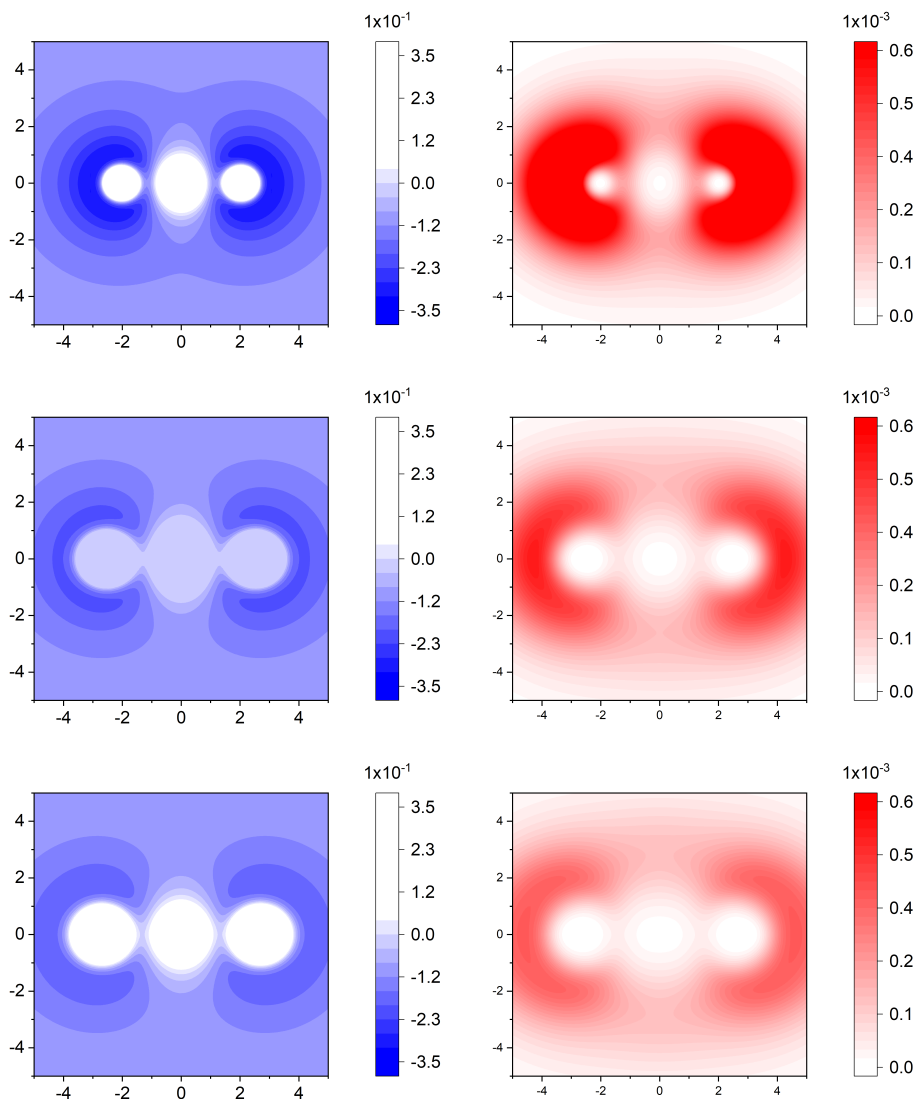

**Figure S3** Top left : ESP of  $\text{NaF}_2^-$ , Middle left: ESP of  $\text{NaCl}_2^-$ , Bottom left: ESP of  $\text{NaBr}_2^-$ . Top right: positron density of  $\text{PsNaF}_2$ , Middle right: positron density of  $\text{PsNaCl}_2$ , Bottom right: positron density of  $\text{PsNaBr}_2$ .



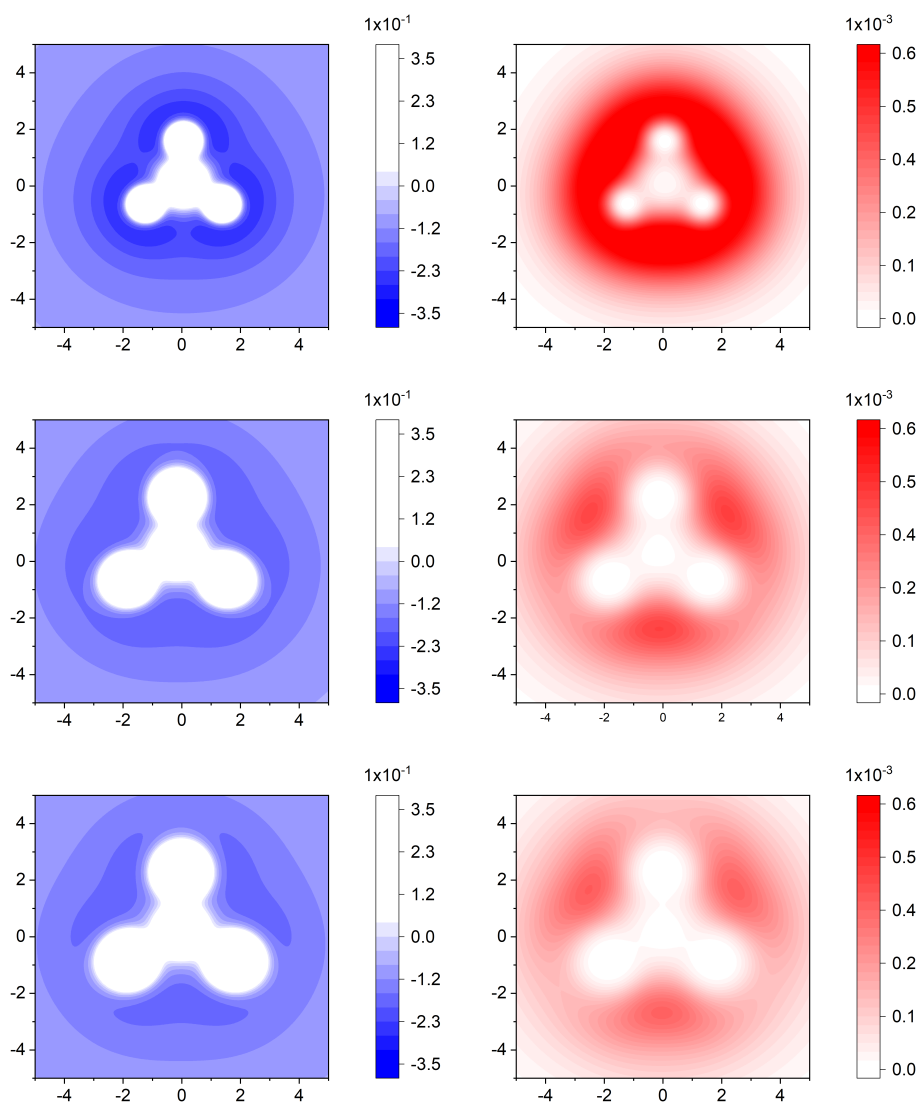

**Figure S4** Top left : ESP of BeF<sub>3</sub><sup>-</sup>, Middle left: ESP of BeCl<sub>3</sub><sup>-</sup>, Bottom left: ESP of BeBr<sub>3</sub><sup>-</sup>. Top right: positron density of PsBeF<sub>3</sub>, Middle right: positron density of PsBeCl<sub>3</sub>, Bottom right: positron density of PsBeBr<sub>3</sub>.

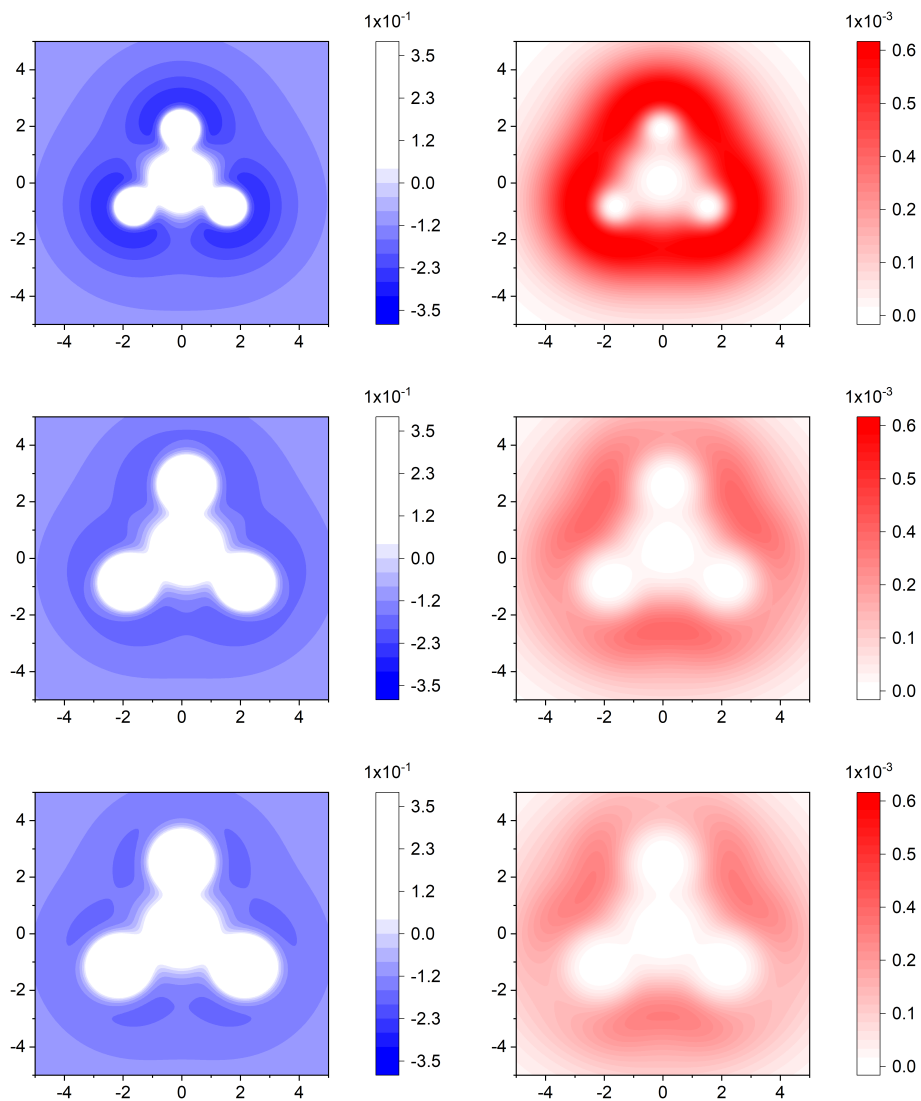

**Figure S5** Top left : ESP of  $\text{MgF}_3^-$ , Middle left: ESP of  $\text{MgCl}_3^-$ , Bottom left: ESP of  $\text{MgBr}_3^-$ . Top right: positron density of  $\text{PsMgF}_3$ , Middle right: positron density of  $\text{PsMgCl}_3$ , Bottom right: positron density of  $\text{PsMgBr}_3$ .

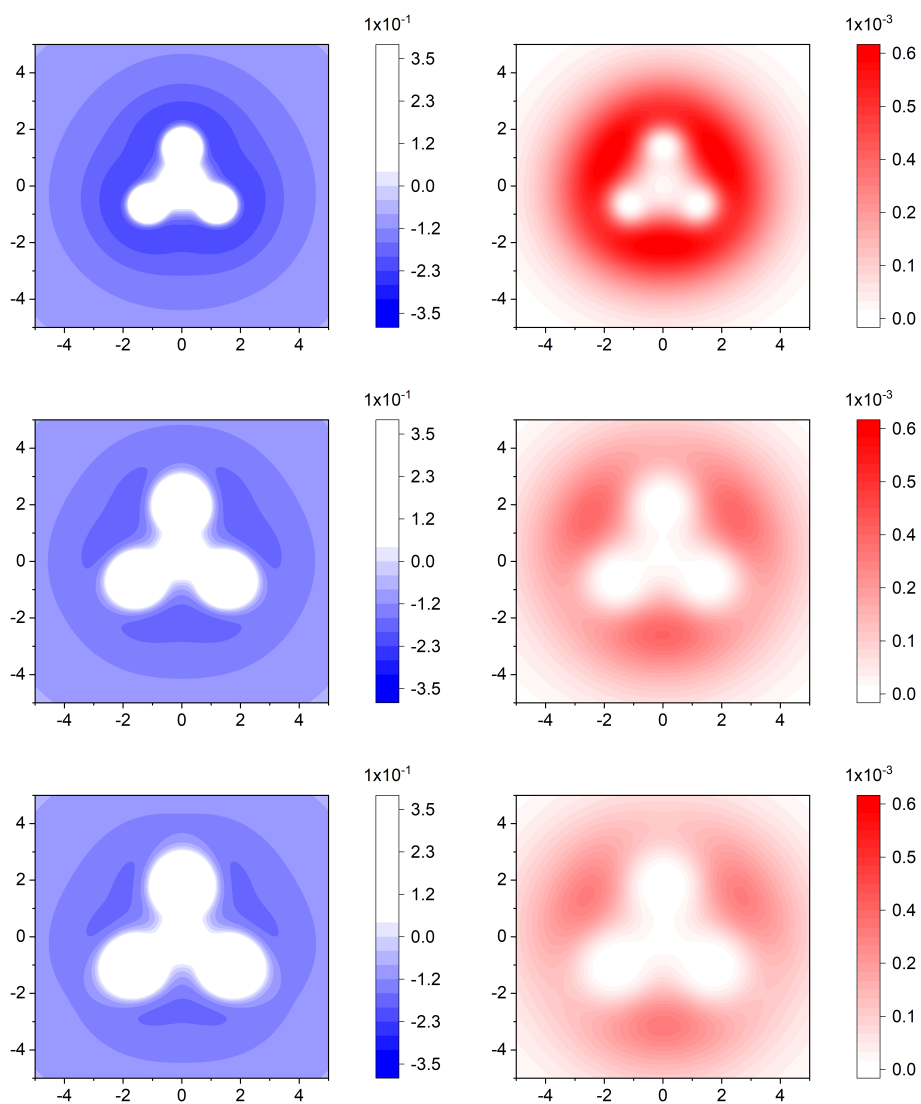

**Figure S6** Top left : ESP of  $\text{BF}_4^-$ , Middle left: ESP of  $\text{BCl}_4^-$ , Bottom left: ESP of  $\text{BBr}_4^-$ . Top right: positron density of  $\text{PsBF}_4$ , Middle right: positron density of  $\text{PsBCl}_4$ , Bottom right: positron density of  $\text{PsBBr}_4$ .

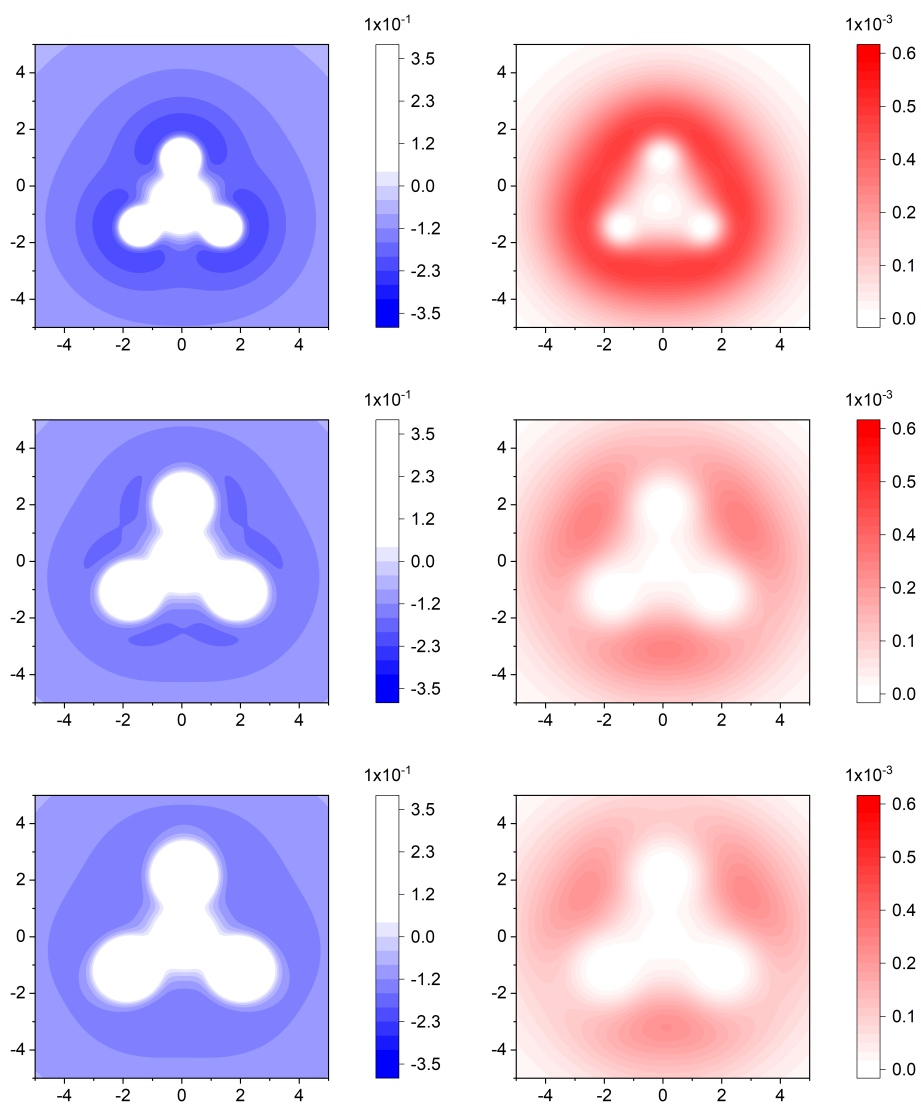

**Figure S7** Top left : ESP of  $\text{AlF}_4^-$ , Middle left: ESP of  $\text{AlCl}_4^-$ , Bottom left: ESP of  $\text{AlBr}_4^-$ . Top right: positron density of  $\text{PsAlF}_4$ , Middle right: positron density of  $\text{PsAlCl}_4$ , Bottom right: positron density of  $\text{PsAlBr}_4$ .

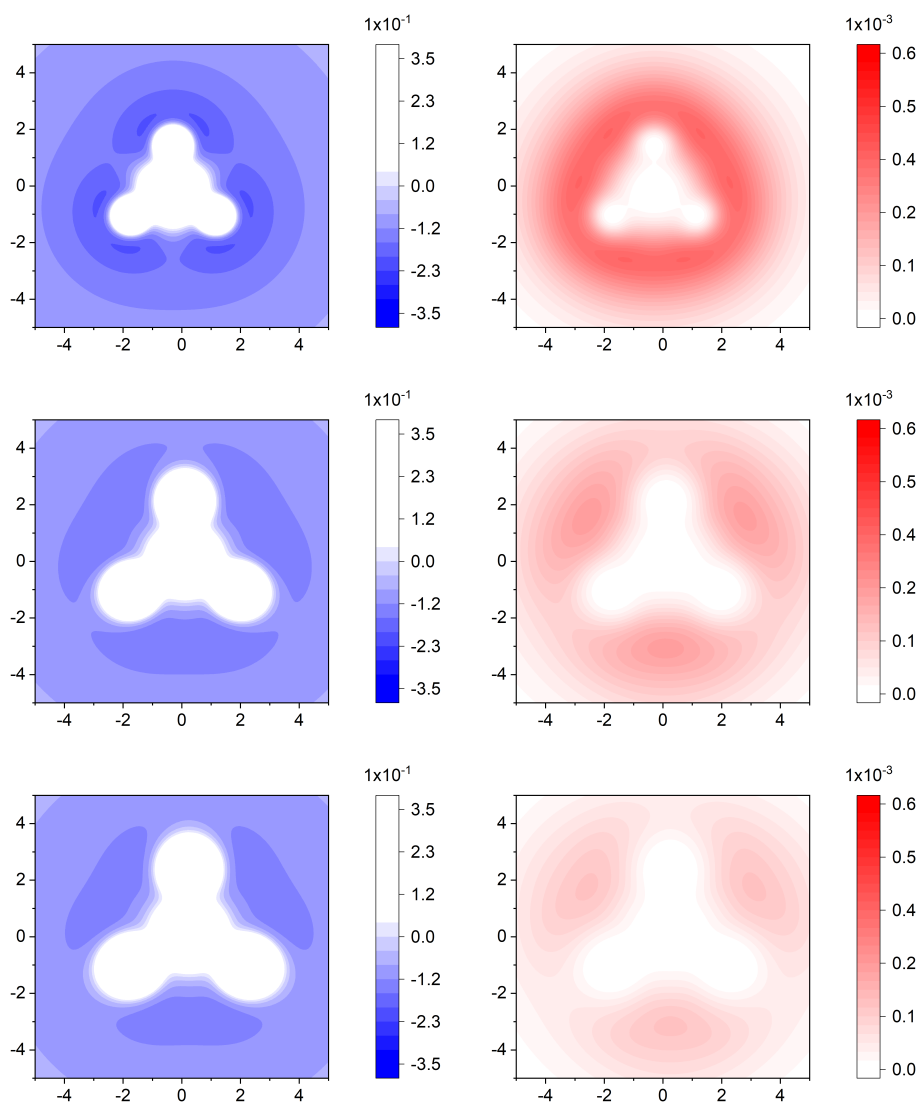

**Figure S8** op left : ESP of  $\text{SiF}_5^-$ , Middle left: ESP of  $\text{SiCl}_5^-$ , Bottom left: ESP of  $\text{SiBr}_5^-$ . Top right: positron density of  $\text{PsSiF}_5$ , Middle right: positron density of  $\text{PsSiCl}_5$ , Bottom right: positron density of  $\text{PsSiBr}_5$ .

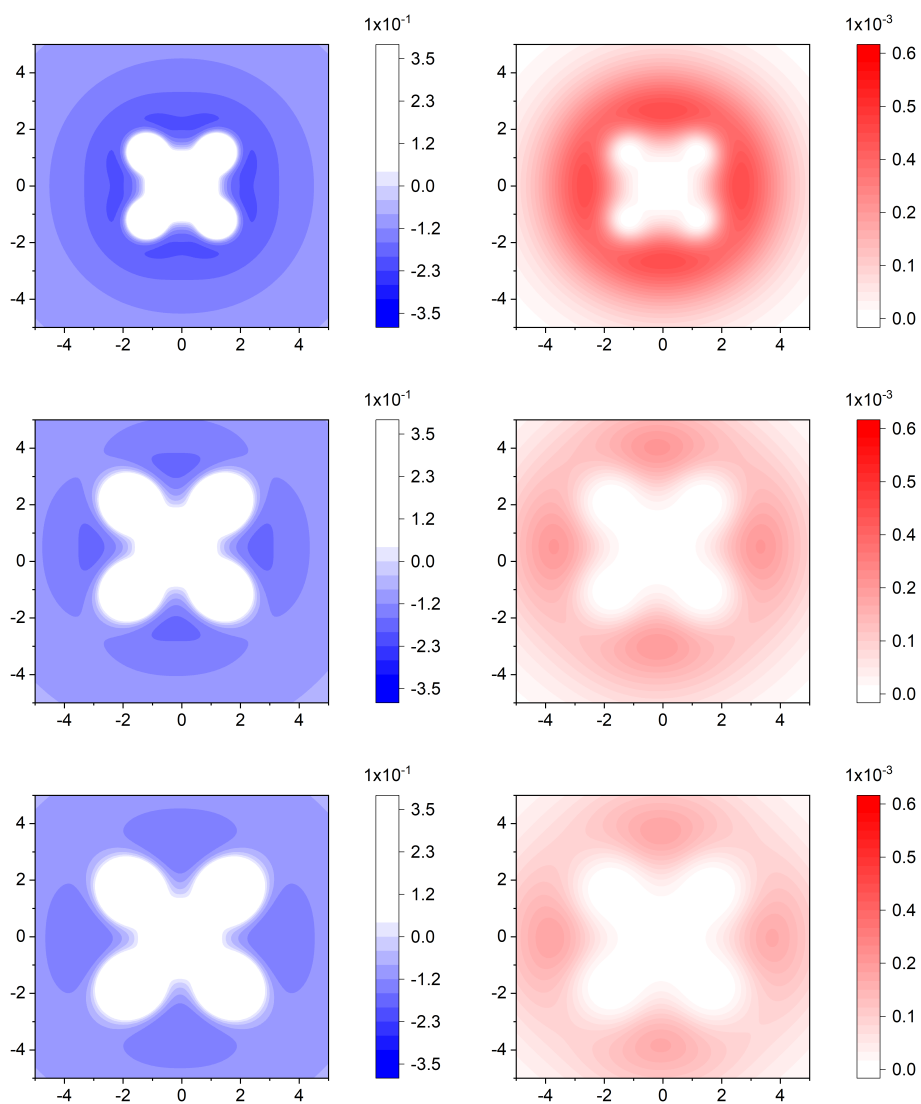

**Figure S9** Top left : ESP of  $\text{PF}_6^-$ , Middle left: ESP of  $\text{PCl}_6^-$ , Bottom left: ESP of  $\text{PBr}_6^-$ . Top right: positron density of  $\text{PsPF}_6$ , Middle right: positron density of  $\text{PsPCl}_6$ , Bottom right: positron density of  $\text{PsPBr}_6$ .

## References

- [1] G. L. Gutsev, P. Jena and R. J. Bartlett, *Chem. Phys. Lett.*, 1998, **292**, 289–294.
